# Supplementary material for: Ligand-Mediated Biofilm Formation via Enhanced Physical Interaction between a Diguanylate Cyclase and Its Receptor
Source: PubMed Central journal article supplement (PMC6050961; doi:10.1128/mbio.01254-18), 2018-07-10
Supplement: mbo004183974sf1.pdf [file mbo004183974sf1.pdf]

```

GcbC      REHANAQESATRGATTIAQL---IDADVLRVTELYDLTLQGLIAAAQRDDLKDVSPQIRH
Z-16      KGYDSHKIALAQSETEMRNLSHSLAEHATHTFQGADVVLDDIVSFMKWRPHSPVFNERL
          . : . : : : . . * : : * : . . * . : * : * : : : : : . . : *

GcbC      LALFDRSTTARFKGDILLDDKHGEVIADSSRVDPLPG-NFADRDYFLAHAFNRDTGMFIS
Z-16      RALADNLPQL---SDVAILDADGQLTYAS--VKPVPALDNSDRSYFRYHRANDDHTLLIT
          ** * . . . * : : ** * : : * * * : * . : : * * * * * * * : : :

GcbC      RPFKPRCDCDDADQWRISFSRRISSNTGEFLGVAVASMKLDYFDQLFNSLDIGIDSTLNI
Z-16      GPIQSRT----SGVWVVFVSRRLLETTDGKFFGVVATIESEYFSTFYKTFDLGPGGSISL
          * : : * . . * : . * * : : * * : : * * : : * * : : * * : : : :

GcbC      INNDGILLAQKPYLQSDSIGKSFAARPNVVRILRDSSGNGSFNSISSMDHQRLYTYSRV
Z-16      LHSDGRLLIQWPSLQT---GRDMANMVLQKALPRSP-DGYLLTVSPFDGLTKYLAYRRV
          : : * * * * * * * * : * : : * . . . * * . * : : * : : * * . : * *

GcbC      GNLPLTVIVALSSSEEVFGAWR-----
Z-16      SRYPLVVTVARTEDSVLSGWREAVRSD
          . . * * . * * * : : . : * : . * *

```

1

2 **Fig. S1. CLUSTAL alignment of the amino acid sequence of the CACHE domain of GcbC and**  
3 **rpHK1S-Z16 (PDB ID: 3LIF) of *R. palustris*.** The CACHE domain of GcbC and rpHK1S-Z16 showed  
4 31% identity at the amino acid level (E-score =  $1e^{-27}$ ). The red amino acids indicate the  
5 conserved residues in the proposed citrate-binding pocket. A subset of these residues are  
6 mutated (see Figures 2 and 3 in the main text, and Table S1).

7
