# Supplementary material for: Ligand-Mediated Biofilm Formation via Enhanced Physical Interaction between a Diguanylate Cyclase and Its Receptor
Source: PubMed Central journal article supplement (PMC6050961; doi:10.1128/mbio.01254-18), 2018-07-10
Supplement: mbo004183974sf3.pdf [file mbo004183974sf3.pdf]

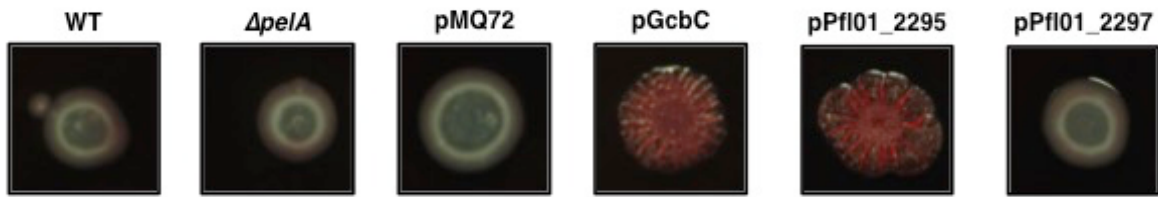

1

2 **Fig. S3. Assessment of DGC activity via congo red binding.** Qualitative analysis of GcbC,  
3 Pfl01\_2295, and Pfl01\_2297 to test for functional c-di-GMP production as described in the main  
4 text. These plasmids were transformed into *P. aeruginosa* PA14, and the strains grown on  
5 congo red plates supplemented with 0.1% arabinose at 37°C to induce expression of the  
6 plasmid-borne DGCs for 24 hours. The binding of red pigment indicates Pel exopolysaccharide  
7 production, which serves as an indirect means to assess the amount of c-di-GMP produced by  
8 the indicated strain. GcbC and Pfl01\_2295 show a higher degree of congo red binding as  
9 compared to the empty pMQ72 control and the *pelA* deletion mutant strain. Pfl01\_2297  
10 showed only a very modest enhancement of congo red binding compared to the empty pMQ72  
11 control and *pelA* deletion mutant strain.

12
