# Supplementary material for: Ligand-Mediated Biofilm Formation via Enhanced Physical Interaction between a Diguanylate Cyclase and Its Receptor
Source: PubMed Central journal article supplement (PMC6050961; doi:10.1128/mbio.01254-18), 2018-07-10
Supplement: mbo004183974sf4.pdf [file mbo004183974sf4.pdf]

1

2

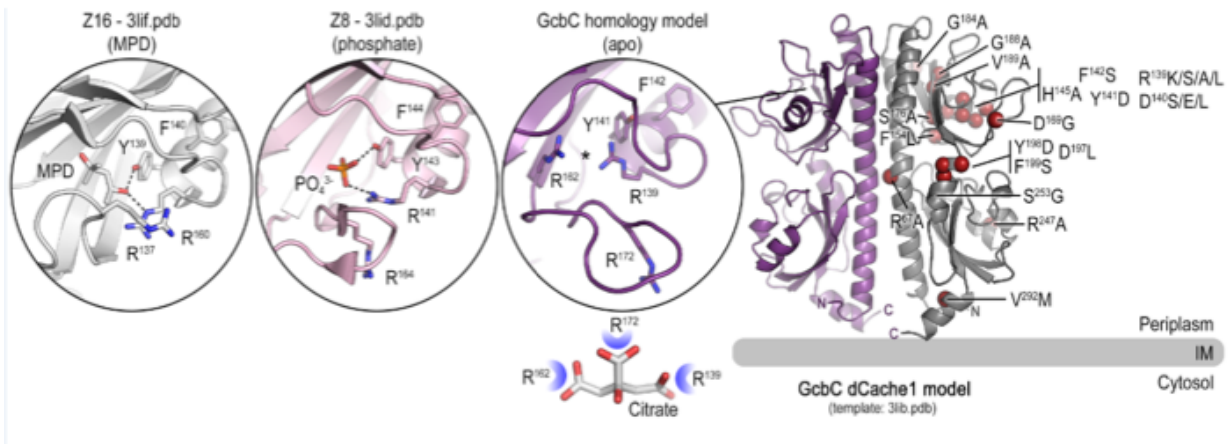

3

4 **Fig. S4. M Modeling the CACHE domain of GcbC on rpHK1S-Z16 (PDB ID: 3LIF) and vpHK1S-Z8**

5 **(PDB ID: 3LID).** Shown is the model of the ligand-binding site of rpHK1S-Z16 (PDB ID: 3LIF) and

6 vpHK1S-Z8 (PDB ID: 3LID), as well as the homology model of the ligand-binding site of the apo-

7 GcbC. On the far right is shown the overall model of the GcbC periplasmic domain based on the

8 structure of rpHK1S-Z16 (PDB ID: 3LIF).

9
