# Supplementary material for: Ligand-Mediated Biofilm Formation via Enhanced Physical Interaction between a Diguanylate Cyclase and Its Receptor
Source: PubMed Central journal article supplement (PMC6050961; doi:10.1128/mbio.01254-18), 2018-07-10
Supplement: mbo004183974sf6.pdf [file mbo004183974sf6.pdf]

1

```

GcbC          -----REHANAQESATRGATTIAQLIDADVLRTVELYDLTLOGLIAAAQRDDLKDVS-
Pfl01_2295   ----SRERALEEVDVHGLNLTQALVTYSEGIVRQS----SALLLGLVERLETEGSGPVQI
Pfl01_2297   -----RSVFASARDSVTNLARATAQHAEDTIRQV----DVLTAGLAERVEGDGLQNLDV
Pfl01_3800   QIEQSRRODLANAQVSSANLTRAMAQQAEDTFLAA----DLVMTSLVDWVQEDGYGAAQK
              . . . . . : : : . : . . . . . * : : . . .

GcbC          PQIRHLALFDRSTTARFKGDILLDDKHGEVIADSSRVDPLPGNFADRDYFLAHAFNRDTG
Pfl01_2295   QRISLIDRQEPLMPQLSG-ITIIYDSQGRWLMSSNRPIPAGANSSDRAYFIHHRDDPSPE
Pfl01_2297   ARIHKLLVQQSKIMPQLHG-LFIYGPDGHWIVTDKEVTPETANNADRDYFYHRTHEARR
Pfl01_3800   PRLQRTFARRVQQLEQLHG-MFLFDREGQWVITSFPDLPRGNGVADREYFKFHQQNVSGV
              . : . . . . . : * : : . * : . . * . : ** ** * . .

GcbC          MFISRPFKPRCDDADQWRISFSRRISSNTGEFLGVAVASMKLDYFDQLFNSLDIGIDS
Pfl01_2295   TFIGPPIQSRTNQE----WVITVSRRFNDARGEFAVVAVTLGIENFLRLFGKIDVQEG
Pfl01_2297   VRIGQVVESRSTHD----LIIPISRRLNPNPDGSFAGVLLGTVKVSYFVDYYGDFRIDDKG
Pfl01_3800   AHIGPAIRSRENGE----WIIPISKRVNDRAGNFQGVLLAGIKMSYFDKFFKSFLDNDG
              * . . . * : . . * . . . * . * ** : : . * : : . . .

GcbC          TLNIINNDGILLAQKPYLQSDSIGKSFAARPNVVRILRDSSGNGSFNSISSMDHQORLYT
Pfl01_2295   AIGLSYTDGTLVRYPFREQD-MGRNFSKSPIYAKYLVDS-VGTASFTSSLDGVERLYA
Pfl01_2297   ALVLAMRDGTILVRRPFITSV-VGKSLANSEIFKTYLPNAN-QGIVQIRAVVDDTERLYG
Pfl01_3800   TMFLGMDGTLARRPFDES-IGTSLAKGEIYQKLLPNAS-AGTAMIDSVVDGVTRLYG
              : : : ** : * . * : . : * : : . * : . . * : : * ***

GcbC          YSRVGNLPLTVIVALSSSEEVFGAWR---
Pfl01_2295   FRKSDRLPLITTVALGKREALAARTEA
Pfl01_2297   YRALTTYPLVVEAGLSRDSIVAPWRQ-
Pfl01_3800   YRQLESYPLVVAASSSRDTILQGWYDR-
              : . . . . . *

```

2

3 **Fig. S6. CLUSTAL alignment of the amino acid sequence of the CACHE domains of GcbC,**  
4 **Pfl01\_2295, and Pfl01\_2297.** The red amino acids indicate the conserved residues of the RXYF  
5 motif. The residues highlighted in blue are proposed to make up the putative citrate-binding  
6 pocket of the CACHE domain of GcbC. The RXYF motif and residues R139 and R162 of GcbC are  
7 conserved in the CACHE domains of Pfl01\_2295, Pfl01\_2297, and Pfl01\_3800.

8
