# Supplementary material for: Ligand-Mediated Biofilm Formation via Enhanced Physical Interaction between a Diguanylate Cyclase and Its Receptor
Source: PubMed Central journal article supplement (PMC6050961; doi:10.1128/mbio.01254-18), 2018-07-10
Supplement: mbo004183974sf7.pdf [file mbo004183974sf7.pdf]

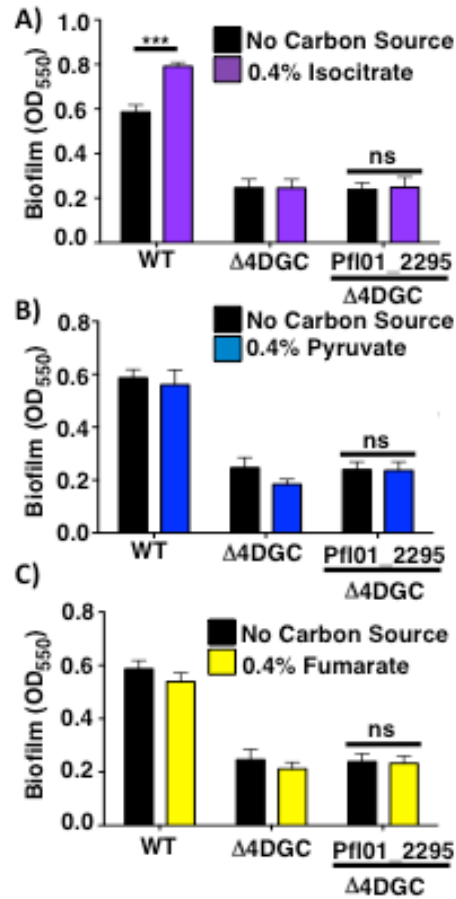

1

2 **Fig. S7. Identification of potential ligands sensed by Pfl01\_2295.** Shown are the results of

3 biofilm assays with the indicated strains. For each panel, the presence and absence of each

4 organic acid was compared for each biofilm assay. Panel A = +/- isocitrate; B = +/- pyruvate; C =

5 +/- fumarate. Biofilm assays are representative of six biological replicates  $P < 0.001$  (\*\*\*).

6
