# Supplementary material for: Ligand-Mediated Biofilm Formation via Enhanced Physical Interaction between a Diguanylate Cyclase and Its Receptor
Source: PubMed Central journal article supplement (PMC6050961; doi:10.1128/mbio.01254-18), 2018-07-10
Supplement: mbo004183974st1.pdf [file mbo004183974st1.pdf]

**Table S1. CACHE Domain Mutations.**

| <b>Mutation</b> | <b>Amino Acid Number</b> | <b>Stable<sup>a</sup></b> |
|-----------------|--------------------------|---------------------------|
| R to A          | 139                      | Yes                       |
| R to E          | 139                      | Yes                       |
| Y to F          | 141                      | No <sup>b</sup>           |
| R to A          | 162                      | Yes                       |
| $\Delta$ CACHE  | 113 - 297                | No                        |
| R to A          | 67                       | No                        |
| R to A          | 79                       | No                        |
| R to K          | 139                      | No                        |
| R to S          | 139                      | No                        |
| D to S          | 140                      | No                        |
| D to E          | 140                      | No                        |
| Y to D          | 141                      | No                        |
| H to A          | 145                      | No                        |
| F to L          | 154                      | No                        |
| R to E          | 162                      | No                        |
| D to G          | 169                      | No                        |
| R to A          | 172                      | No                        |
| R to E          | 172                      | No                        |
| S to A          | 176                      | No                        |
| G to A          | 184                      | No                        |
| G to A          | 188                      | No                        |
| V to A          | 189                      | No                        |
| R to A          | 247                      | No                        |
| S to G          | 253                      | No                        |
| V to M          | 292                      | No                        |
| S to N          | 304                      | No                        |
| DY to AA        | 140 – 141                | No                        |
| DY to AA        | 197 – 198                | No                        |
| DYF to SFF      | 140 – 142                | No                        |
| DYF to LDS      | 197 - 199                | No                        |
| RDYF to LLDS    | 139 - 142                | No                        |

<sup>a</sup>As assessed by Western blot.

<sup>b</sup>While we could detect the GcbC protein for the Y141F mutant it was much less stable than the WT.
