# Supplementary material for: Ligand-Mediated Biofilm Formation via Enhanced Physical Interaction between a Diguanylate Cyclase and Its Receptor
Source: PubMed Central journal article supplement (PMC6050961; doi:10.1128/mbio.01254-18), 2018-07-10
Supplement: mbo004183974st2.pdf [file mbo004183974st2.pdf]

**Table S2. Strains, Plasmids, and Primers Used in this Study.**

| Strain                                 | Genotype or Description                                                                                                                                   | Reference  |
|----------------------------------------|-----------------------------------------------------------------------------------------------------------------------------------------------------------|------------|
| <b><i>Saccharomyces cerevisiae</i></b> |                                                                                                                                                           |            |
| InvSc1                                 | MATa/ MAT $\alpha$ leu2/ leu2 trp1-289/trp1-289<br>ura3-52/ura3-                                                                                          | Invitrogen |
| <b><i>Escherichia coli</i></b>         |                                                                                                                                                           |            |
| S17-1- $\lambda$ -pir                  | <i>thi pro hsdR- hsdM + <math>\Delta</math>recA RP4-2::TcMu-Km::Tn7</i>                                                                                   | 1          |
| BTH101                                 | F-, <i>cya-99, araD139, galE15, galK16, rpsL1 (Str r), hsdR2, mcrA1, mcrB1.</i>                                                                           | Euromedex  |
| <b><i>Pseudomonas aeruginosa</i></b>   |                                                                                                                                                           |            |
| SMC 232                                | Wild type PA14                                                                                                                                            | 2          |
| SMC 2893                               | $\Delta$ <i>pelA</i>                                                                                                                                      | 3          |
| SMC 7218                               | pMQ72                                                                                                                                                     | This Study |
| SMC 7219                               | pMQ72 GcbC                                                                                                                                                | This Study |
| SMC 6150                               | pMQ72 Pfl01_2295                                                                                                                                          | This Study |
| SMC 6149                               | pMQ72 Pfl01_2297                                                                                                                                          | This Study |
| <b><i>Pseudomonas fluorescens</i></b>  |                                                                                                                                                           |            |
| SMC 4798                               | Wild Type, HA-tagged LapA variant                                                                                                                         | 4          |
| SMC 4754                               | SMC 4798 with unmarked deletion of $\Delta$ <i>gcbC</i>                                                                                                   | 5          |
| SMC 4945                               | Wild Type + pMQ72 GcbC-HA                                                                                                                                 | This Study |
| SMC 4946                               | Wild Type + pMQ72 GcbC (GGAAF)-HA                                                                                                                         | This Study |
| SMC 7288                               | $\Delta$ <i>lapA</i>                                                                                                                                      | This Study |
| SMC 6202                               | SMC 4798 with unmarked deletion of $\Delta$ <i>gcbA <math>\Delta</math>gcbB <math>\Delta</math>gcbC <math>\Delta</math>wspR (<math>\Delta</math>4DGC)</i> | 5          |
| SMC 7211                               | $\Delta$ 4DGC + pMQ72 GcbC-HA                                                                                                                             | This Study |
| SMC 7213                               | $\Delta$ 4DGC + pMQ72 GcbC (GGAAF)-HA                                                                                                                     | This Study |
| SMC 7699                               | $\Delta$ 4DGC + pMQ72                                                                                                                                     | This Study |
| SMC 7701                               | $\Delta$ 4DGC + pMQ72 GcbC R139A-HA                                                                                                                       | This Study |
| SMC 7702                               | $\Delta$ 4DGC + pMQ72 GcbC R139E-HA                                                                                                                       | This Study |
| SMC 7703                               | $\Delta$ 4DGC + pMQ72 GcbC R162A-HA                                                                                                                       | This Study |
| SMC 6154                               | $\Delta$ 4DGC + pMQ72 Pfl01_2295                                                                                                                          | 6          |
| SMC 6153                               | $\Delta$ 4DGC + pMQ72 Pfl01_2297                                                                                                                          | This Study |
| <b>Plasmids</b>                        |                                                                                                                                                           |            |
| pMQ72                                  |                                                                                                                                                           | 7          |
| pKNT25 vector                          |                                                                                                                                                           | Euromedex  |
| pUT18 vector                           |                                                                                                                                                           | Euromedex  |
| pKT25-zip positive control             |                                                                                                                                                           | Euromedex  |
| pUT18C-zip positive control            |                                                                                                                                                           | Euromedex  |
| pKNT25 GcbC                            |                                                                                                                                                           | 6          |

|                                |                                                               |            |
|--------------------------------|---------------------------------------------------------------|------------|
| pKNT25 GcbC (GGAAF)            |                                                               | 6          |
| pKNT25 GcbC R139E              |                                                               | This Study |
| pKNT25 GcbC R363E              |                                                               | 8          |
| pKNT25 GcbC R366E              |                                                               | 8          |
| pKNT25 GcbA                    |                                                               | 9          |
| pKNT25 GcbB                    |                                                               | 9          |
| pKNT25 WspR                    |                                                               | 9          |
| pKNT25 Pfl01_0050              |                                                               | 9          |
| pKNT25 Pfl01_0190              |                                                               | 9          |
| pKNT25 Pfl01_0692              |                                                               | 9          |
| pKNT25 Pfl01_1323              |                                                               | 9          |
| pKNT25 Pfl01_1336              |                                                               | 9          |
| pKNT25 Pfl01_2049              |                                                               | 9          |
| pKNT25 Pfl01_2170              |                                                               | 9          |
| pKNT25 Pfl01_2176              |                                                               | 9          |
| pKNT25 Pfl01_2295              |                                                               | 9          |
| pKNT25 Pfl01_2297              |                                                               | 9          |
| pKNT25 Pfl01_3508              |                                                               | 9          |
| pKNT25 Pfl01_3550              |                                                               | 9          |
| pKNT25 Pfl01_3800              |                                                               | 9          |
| pKNT25 Pfl01_4084              |                                                               | 9          |
| pKNT25 Pfl01_4307              |                                                               | 9          |
| pKNT25 Pfl01_4451              |                                                               | 9          |
| pKNT25 Pfl01_5168              |                                                               | 9          |
| pUT18 GcbC                     |                                                               | 6          |
| pUT18 LapD                     |                                                               | 6          |
| pUT18 Pfl01_0192               |                                                               | 9          |
| pUT18 Pfl01_2920               |                                                               | 9          |
| <b>Primers</b>                 |                                                               |            |
| pMQ72 Sequence Verify Forward  | 5' – CGCAACTCTCTACTGTTTCTCC – 3'                              | This Study |
| pMQ72 Sequence Verify Reverse  | 5' – GGCTGAAAATCTTCTCTCATCCGCC – 3'                           | This Study |
| pKNT25 Sequence Verify Forward | 5' – GCGGATAACAATTTACACAGG – 3'                               | This Study |
| pKNT25 Sequence Verify Reverse | 5' – CGTAACCAGCCTGATGCGATTGC – 3'                             | This Study |
| pKNT25-GcbC Forward            | 5' – CGCACGCCAAGCTTGATGATCGCGAG – 3'                          | This Study |
| pMQ72-GcbC Forward             | 5' – GGGCTAGCGAATTCGAGCTCGGTACC CCCGA AACCGAACCATGATCGCC - 3' | This Study |
| pMQ72-GcbC Reverse             | 5' – GCAGGTCGACTCTAGAGGATCCCCTCA AGCGT                        | This Study |

|                                   |                                   |            |
|-----------------------------------|-----------------------------------|------------|
|                                   | AATCTGG – 3'                      |            |
| GcbC R139A Point Mutation Forward | 5' – GCCGACGCTGACTACTTCCTCG – 3'  | This Study |
| GcbC R139A Point Mutation Reverse | 5' – GTAGTCAGCGTCGGCGAAATTGC – 3' | This Study |
| GcbC R139E Point Mutation Forward | 5' – GCCGACGAAGACTACTTCCTCG – 3'  | This Study |
| GcbC R139E Point Mutation Reverse | 5' – GTAGTCTTCGTCGGCGAAATTGC – 3' | This Study |
| GcbC R162A Point Mutation Forward | 5' – CCCGCTTGCGACTGCGATGACG – 3'  | This Study |
| GcbC R162A Point Mutation Reverse | 5' – GCAGTCGCAAGCGGGCTTGAACG – 3' | This Study |

## Literature Cited

1. Simon R, Preifer U, Puhler A (1983) A broad host range mobilization system for *in vivo* genetic engineering: transposon mutagenesis in gram negative bacteria. *Nat Biotechnol* 1: 784-791.
2. Qi Y, Chuah MLC, Dong X, Xie K, Luo Z, Tang K, Liang Z (2011) Binding of cyclic diguanylate in the non-catalytic EAL domain of FimX induces a long-range conformational change. *J Biol Chem* 286: 2910-2917.
3. Friedman L, Kolter R (2004) Genes involved in matrix formation in *Pseudomonas aeruginosa* PA14 biofilms. *Mol Microbiol* 51(3): 675-690.
4. Monds RD, Newell PD, Gross RH, O'Toole GA (2007) Phosphate-dependent modulation of c-di-GMP levels regulates *Pseudomonas fluorescens* Pf0-1 biofilm formation by controlling secretion of the adhesin LapA. *Mol Microbiol* 63(3): 659-679.
5. Newell PD, Yoshioka S, Hvorecny KL, Monds RD, O'Toole GA (2011) Systematic analysis of diguanylate cyclases that promote biofilm formation by *Pseudomonas fluorescens* Pf0-1. *J Bacteriol* 193(18): 4685-4698.
6. Dahlstrom KM, Giglio KM, Collins AJ, Sondermann H, O'Toole GA (2015) Contribution of physical interactions to signaling specificity between a diguanylate cyclase and its effector. *mBio* 6(6):e01978-15. doi:10.1128/mBio.01978-15.
7. Shanks RMA, Calazza NC, Hinsa SM, Toutain CM, O'Toole GA (2006) *Saccharomyces cerevisiae*-based molecular tool kit for manipulation of gram-negative bacterial genes. *Appl Environ Microbiol* 72(7): 5027-5036.

8. Dahlstrom KM, Gilgio KM, Sondermann H, O'Toole HA (2016) The inhibitory site of a diguanylate cyclase is a necessary element for interaction and signaling with an effector protein. *J Bacteriol* 198(11): 1595-1603.
9. Dahlstrom KM, Collins AJ, Doing G, Taroni JN, Gauvin TJ, Greene CS, Hogan DA, O'Toole GA (2018) A multimodal strategy used by a large c-di-GMP network. *J Bacteriol*.  
doi:10.1128/JB.00703-00717.
